# Supplementary material for: Hindgut Microbiota Reflects Different Digestive Strategies in Dung Beetles (Coleoptera: Scarabaeidae: Scarabaeinae)
Source: PubMed Central journal article supplement (PMC8090880; doi:10.1128/aem.02100-20), 2021-02-12
Supplement: AEM.02100-20-s0001.pdf [file AEM.02100-20-s0001.pdf]

Table S1. **Species list.** Details of the dates and collecting localities for the dung beetle gut microbe community samples. Australian Endemic Genera (AuEG) species are listed in alphabetical order followed by the *Onthophagus* species in alphabetical order.

| Species                   | n | S   | locality               | state | coordinates    | date collected        |
|---------------------------|---|-----|------------------------|-------|----------------|-----------------------|
| Amphistomus NSW1          | 4 | M   | Lamington: O'Reillys   | QLD   | -28.22, 153.14 | Feb 2018              |
| Amphistomus NSW1          | 2 | M   | Springbrook: Ankida    | QLD   | -28.16, 153.26 | Mar 2018              |
| Cephalodesmius armiger    | 4 | M,F | Lamington: O'Reillys   | QLD   | -28.22, 153.14 | May 2017,<br>Feb 2018 |
| Cephalodesmius armiger    | 3 | M,F | Levers Plateau         | QLD   | -28.29, 152.86 | Jan 2018              |
| Cephalodesmius armiger    | 2 | M,F | Mt Glorious            | QLD   | -27.24, 152.78 | Jan 2018              |
| Cephalodesmius armiger    | 2 | F   | Yabbra                 | NSW   | -28.52, 152.56 | Dec 2017              |
| Cephalodesmius armiger    | 2 | M,F | Springbrook: Bandicoot | QLD   | -28.21, 153.27 | May 2017              |
| Cephalodesmius armiger    | 3 | M,F | Cunningham's Gap       | QLD   | -28.03, 152.40 | Feb 2016,<br>May 2017 |
| Cephalodesmius armiger    | 3 | M,F | Bunya Mtns             | QLD   | -26.80, 151.61 | Aug 2017              |
| Cephalodesmius laticollis | 2 | M,F | Springbrook: Repeater  | QLD   | -28.22, 153.27 | May 2017              |
| Cephalodesmius laticollis | 1 | M   | Mt Tamborine           | QLD   | -27.91, 153.21 | Jun 2017              |
| Cephalodesmius laticollis | 1 | ND  | Lamington: BinnaBurra  | QLD   | -28.20, 153.19 | Feb 2016              |
| Cephalodesmius quadridens | 1 | ND  | Dwyer Scrub            | QLD   | -27.66, 152.11 | Feb 2016              |
| Cephalodesmius quadridens | 4 | M,F | Bunya Mtns             | QLD   | -26.80, 151.61 | Aug 2017              |
| Cephalodesmius quadridens | 1 | F   | Boombana               | QLD   | -27.35, 152.82 | Jan 2018              |
| Cephalodesmius quadridens | 3 | M,F | Gold Creek             | QLD   | -27.46, 152.88 | Feb 2018,<br>Mar 2018 |
| Demarziella interrupta    | 2 | M,F | Lamington: O'Reillys   | QLD   | -28.22, 153.14 | Feb 2018              |
| Demarziella scarpensis    | 2 | M,F | Springbrook: Ankida    | QLD   | -28.16, 153.26 | Mar 2018              |
| Diorygopyx simpliciclunus | 3 | F   | Lamington: O'Reillys   | QLD   | -28.22, 153.14 | Feb 2018              |
| Diorygopyx tibialis       | 3 | M,F | Springbrook: Ankida    | QLD   | -28.16, 153.26 | Aug 2017,<br>Mar 2018 |
| Labroma umbratilis        | 4 | M,F | Seabird                | WA    | -31.27, 115.44 | Sept 2017             |
| Lepanus australis         | 1 | M   | Gold Creek             | QLD   | -27.46, 152.88 | Feb 2018              |
| Lepanus NSW2              | 2 | M,F | Springbrook: Ankida    | QLD   | -28.16, 153.26 | Mar 2018              |
| Lepanus ustulatus         | 1 | F   | Springbrook: Ankida    | QLD   | -28.16, 153.26 | Mar 2018              |
| Lepanus ustulatus         | 1 | F   | Boombana               | QLD   | -27.35, 152.82 | Jan 2018              |
| Mentophilus hollandiae    | 2 | F   | Quobba                 | WA    | -24.48, 113.42 | Aug 2017              |
| Tesserodon pilicrepus     | 2 | M   | Quobba                 | WA    | -24.48, 113.42 | Aug 2017              |

| <b>Species</b>          | <b>n</b> | <b>S</b> | <b>locality</b>      | <b>state</b> | <b>coordinates</b> | <b>date collected</b> |
|-------------------------|----------|----------|----------------------|--------------|--------------------|-----------------------|
| Onthophagus arrilla     | 1        | ND       | Springbrook: Ankida  | QLD          | -28.16, 153.26     | Aug 2017              |
| Onthophagus CQ2         | 1        | ND       | Springbrook: Ankida  | QLD          | -28.16, 153.26     | Aug 2017              |
| Onthophagus dunningi    | 4        | M,F      | Gold Creek           | QLD          | -27.46, 152.88     | Mar 2018              |
| Onthophagus dunningi    | 1        | F        | Springbrook: Ankida  | QLD          | -28.16, 153.26     | Mar 2018              |
| Onthophagus fuliginosus | 2        | M,F      | Lamington: O'Reillys | QLD          | -28.22, 153.14     | Feb 2018              |
| Onthophagus granulatus  | 4        | F        | Imbil                | QLD          | -26.47, 152.63     | Mar 2018              |
| Onthophagus kumbaingeri | 1        | F        | Springbrook: Ankida  | QLD          | -28.16, 153.26     | Mar 2018              |
| Onthophagus pugnax      | 3        | M,F      | Bunya Mtns           | QLD          | -26.80, 151.61     | Nov 2017              |
| Onthophagus pugnax      | 1        | F        | Lamington: O'Reillys | QLD          | -28.22, 153.14     | Feb 2018              |

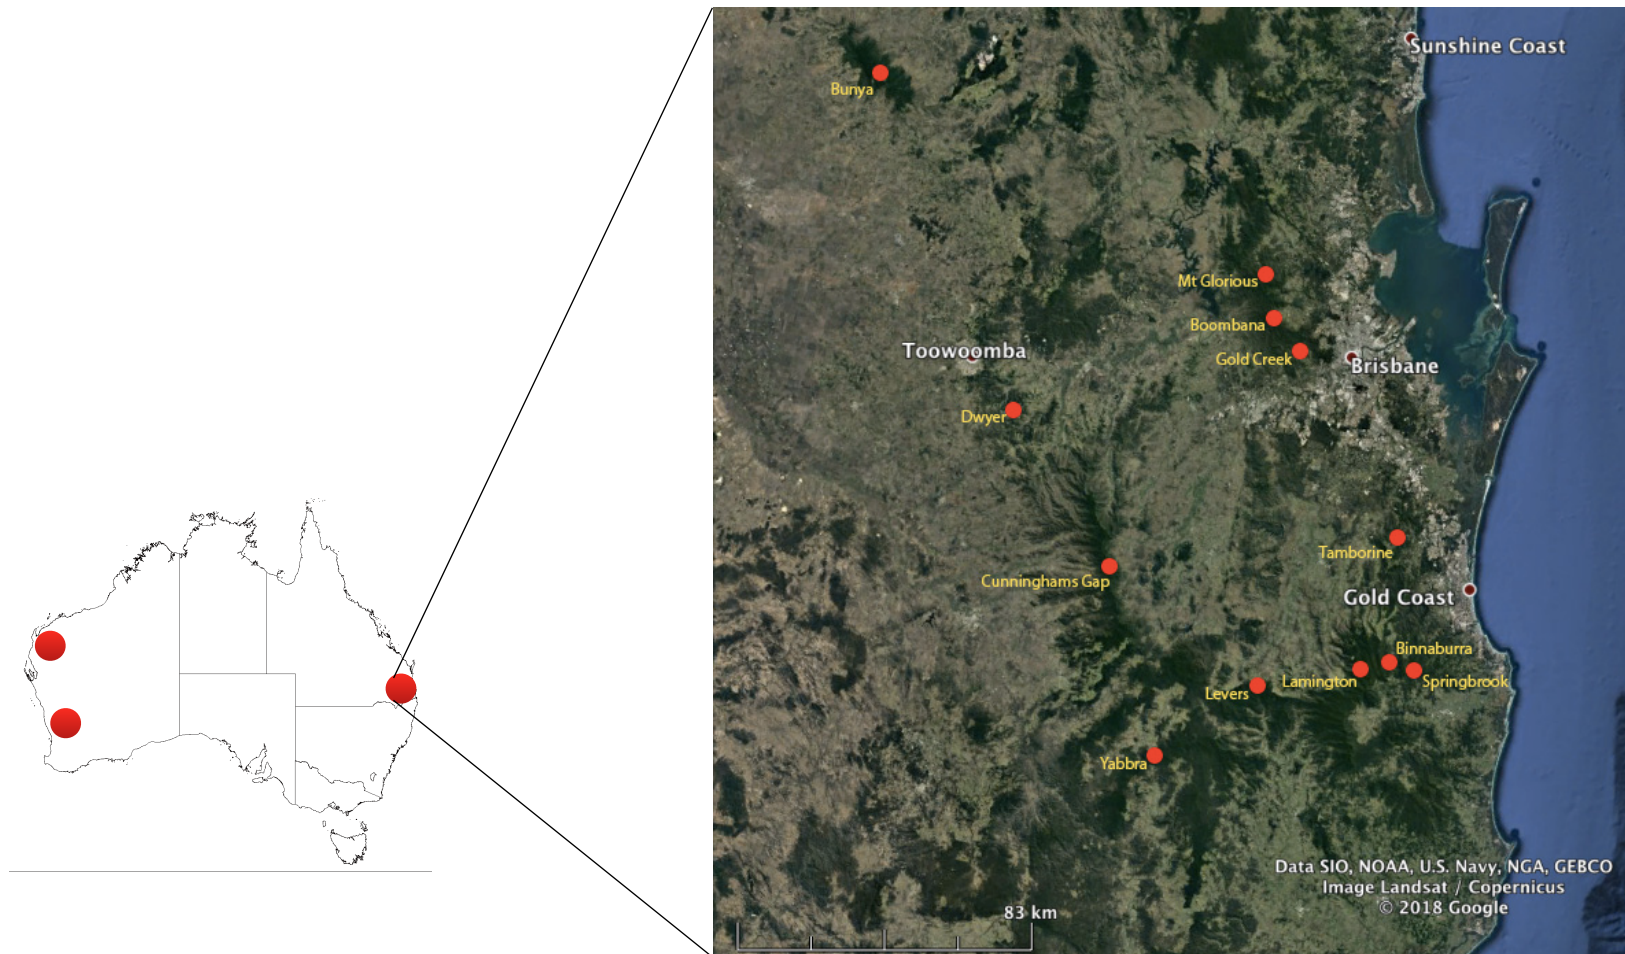

**Figure S1. Map of Australia showing the three general locations where dung beetle species were collected.** Expanded map (right) shows the twelve collecting sites in southeast Queensland. SE Queensland populations are distributed in rainforest areas. See Supplemental Table 1 for detailed location information. Southeast Queensland map accessed from Google Earth. Line map of Australia accessed from Wikimedia Commons (Creative Commons Attribution-Share Alike 3.0).

**Table S2. Core bacterial families present in *Amphistomus*.** Relative abundance of bacterial families is calculated from an average of six individuals of *Amphistomus* NSW1.

| Phylum: CLASS: Family                                         | average relative frequency | total for phylum |
|---------------------------------------------------------------|----------------------------|------------------|
| Bacteroidetes: BACTEROIDIA<br>Porphyromonadaceae              | 19.5                       | 20.44            |
| Bacteroidetes:<br>FLAVOBACTERIIA<br>Flavobacteriaceae         | 0.9                        |                  |
| Firmicutes: BACILLI:<br>Enterococcaceae                       | 3.2                        | 10.4             |
| Firmicutes: CLOSTRIDIA:<br>Ruminococcaceae                    | 5.4                        |                  |
| Firmicutes:<br>ERYSIPELOTRICHIA;<br>Erysipelotrichaceae       | 1.8                        |                  |
| Proteobacteria:<br>ALPHAPROTEOBACTERIA:<br>Anaplasmataceae    | 5.9                        | 5.9              |
| Proteobacteria:<br>BETAPROTEOBACTERIA:<br>Comamonadaceae      | 4.1                        | 4.1              |
| Proteobacteria:<br>GAMMAPROTEOBACTERIA:<br>Enterobacteriaceae | 8.3                        | 40.2             |
| Proteobacteria:<br>GAMMAPROTEOBACTERIA:<br>Orbaceae           | 8.0                        |                  |
| Proteobacteria:<br>GAMMAPROTEOBACTERIA:<br>Moraxellaceae      | 0.9                        |                  |
| Proteobacteria:<br>GAMMAPROTEOBACTERIA:<br>Pseudomonadaceae   | 3.7                        |                  |
| Proteobacteria:<br>GAMMAPROTEOBACTERIA:<br>Xanthomonadaceae   | 19.3                       |                  |
| total % core                                                  | 81                         |                  |

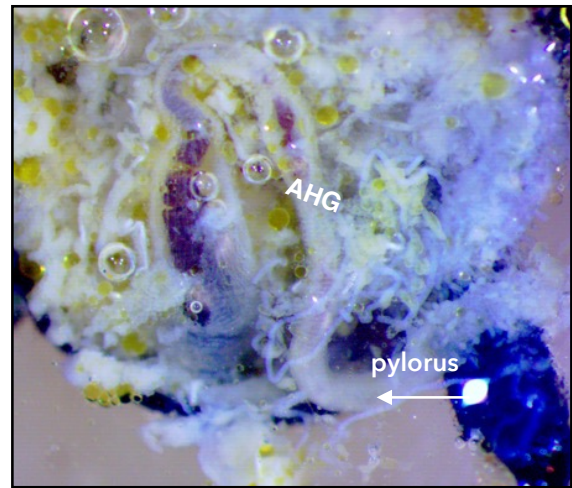

**Fig.S2. *Amphistomus* hindgut.** *Amphistomus* NSW1 hindgut *in situ* shows a short hind-gut and a narrow anterior section.

**Table S3. Core bacterial families present in *Cephalodesmius*.** Relative abundance of bacterial families is calculated from an average of 97% of individuals (31/32) from three species: *Cephalodesmius quadridens*, *C. armiger* and *C. laticollis*.

| Phylum: CLASS: Family                                          | average relative frequency | total for phylum |
|----------------------------------------------------------------|----------------------------|------------------|
| Actinobacteria:<br>CORIOBACTERIIA:<br>Coriobacteriaceae        | 0.5                        | 0.5              |
| Bacteroidetes:<br>BACTEROIDIA<br>Porphyromonadaceae            | 10.8                       | 29.7             |
| Bacteroidetes:<br>BACTEROIDIA<br>Bacteroidaceae                | 6.2                        |                  |
| Bacteroidetes:<br>BACTEROIDIA<br>Rikenellaceae                 | 12.7                       |                  |
| Firmicutes:<br>NEGATIVICUTES<br>Acidaminococcaceae             | 1.1                        | 33.1             |
| Firmicutes: CLOSTRIDIA<br>Ruminococcaceae                      | 19.4                       |                  |
| Firmicutes: CLOSTRIDIA<br>Lachnospiraceae                      | 6.0                        |                  |
| Firmicutes: CLOSTRIDIA<br>Clostridiales Family XIII            | 0.4                        |                  |
| Firmicutes: CLOSTRIDIA<br>Christensenellaceae                  | 6.2                        |                  |
| Proteobacteria:<br>BETAPROTEOBACTERIA:<br>Oxalobacteriaceae    | 0.4                        | 0.4              |
| Proteobacteria:<br>BETAPROTEOBACTERIA:<br>Comamonadaceae       | 1.6                        | 1.6              |
| Proteobacteria:<br>DELTAPROTEOBACTERIA:<br>Desulfovibrionaceae | 15.3                       | 15.3             |
| Planctomycetes: vadinHA49                                      | 4.8                        | 4.8              |
| total core                                                     | 85.4                       |                  |

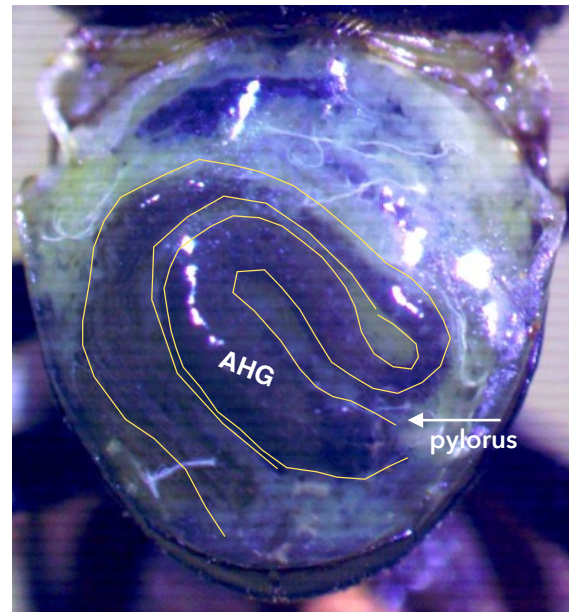

**Fig. S3. *Cephalodesmius* hindgut.** Hindgut of *Cephalodesmius quadridens* *in situ* shows the expanded anterior hindgut region and the additional gut loop to accommodate the extra length.

**Table S4. Core bacterial families present in *Demarziella*.** Relative abundance of bacterial families is calculated from an average of four individuals of *Demarziella*: two from each species of *Demarziella interrupta* and *D. scarpensis*.

| Phylum: CLASS: Family                                         | average relative frequency | total for phylum |
|---------------------------------------------------------------|----------------------------|------------------|
| Bacteroidetes: BACTEROIDIA<br>Porphyromonadaceae              | 25.4                       | 26.5             |
| Bacteroidetes:<br>FLAVOBACTERIIA                              | 1.1                        |                  |
| Firmicutes: BACILLI:<br>Erysipelotrichaceae                   | 4.4                        | 7.0              |
| Firmicutes: CLOSTRIDIA:<br>Family XI                          | 2.3                        |                  |
| Firmicutes: BACILLI:<br>Lactobacillales                       | 0.3                        |                  |
| Proteobacteria:<br>BETAPROTEOBACTERIA:<br>Comamonadaceae      | 1.8                        | 2.1              |
| Proteobacteria:<br>BETAPROTEOBACTERIA:<br>Alcaligenaceae      | 0.3                        |                  |
| Proteobacteria:<br>GAMMAPROTEOBACTERIA:<br>Enterobacteriaceae | 23.3                       | 43.0             |
| Proteobacteria:<br>GAMMAPROTEOBACTERIA:<br>Xanthomonadaceae   | 17.4                       |                  |
| Proteobacteria:<br>GAMMAPROTEOBACTERIA:<br>Moraxellaceae      | 1.6                        |                  |
| Proteobacteria:<br>GAMMAPROTEOBACTERIA:<br>Orbaceae           | 0.7                        |                  |
| core percentage:                                              | 78.6                       |                  |

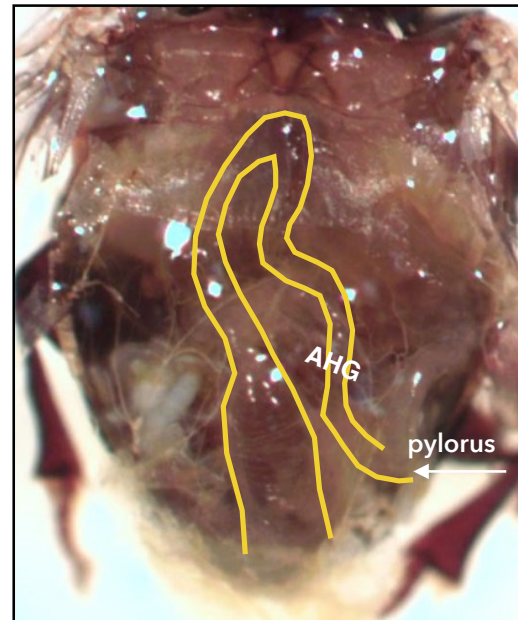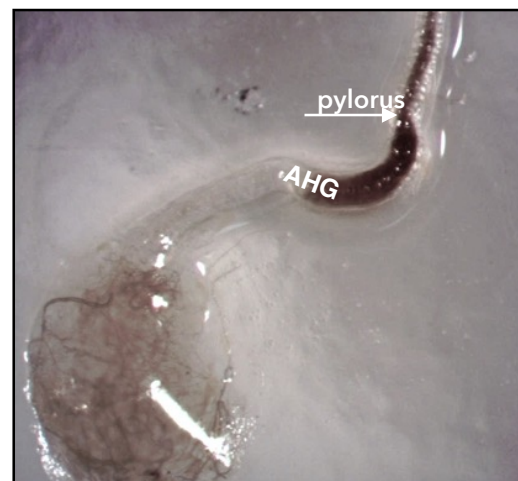

**Fig.S4. *Demarziella interrupta* hindgut.** Above: gut *in situ*; Below: gut removed for better viewing. Anterior hind gut is narrow and short.

**Table S5. Core bacterial families present in *Diorygopyx*.** Relative abundance of bacterial families is calculated from an average of six individuals of *Diorygopyx* (three from each species: *Diorygopyx tibialis* and *D. simpliciclunis*).

| Phylum: CLASS: Family                                         | average relative frequency | total for phylum |
|---------------------------------------------------------------|----------------------------|------------------|
| Bacteroidetes:<br>CHITINOPHAGIA:<br>Chitinophagaceae          | 0.3                        | 6.0              |
| Bacteroidetes:<br>FLAVOBACTERIIA:<br>Flavobacteriaceae        | 5.7                        |                  |
| Firmicutes: CLOSTRIDIA:<br>Family XI                          | 17.5                       | 20.9             |
| Firmicutes: BACILLI:<br>Erysipelotrichaceae                   | 3.4                        |                  |
| Proteobacteria:<br>ALPHAPROTEOBACTERIA:<br>Anapasmataceae     | 3.3                        | 6.1              |
| Proteobacteria:<br>BETAPROTEOBACTERIA:<br>Comamonadaceae      | 2.8                        |                  |
| Proteobacteria:<br>GAMMAPROTEOBACTERIA:<br>Enterobacteriaceae | 25.6                       | 27.3             |
| Proteobacteria:<br>GAMMAPROTEOBACTERIA:<br>Xanthomonadaceae   | 1.7                        |                  |
| total core                                                    | 60.3                       |                  |

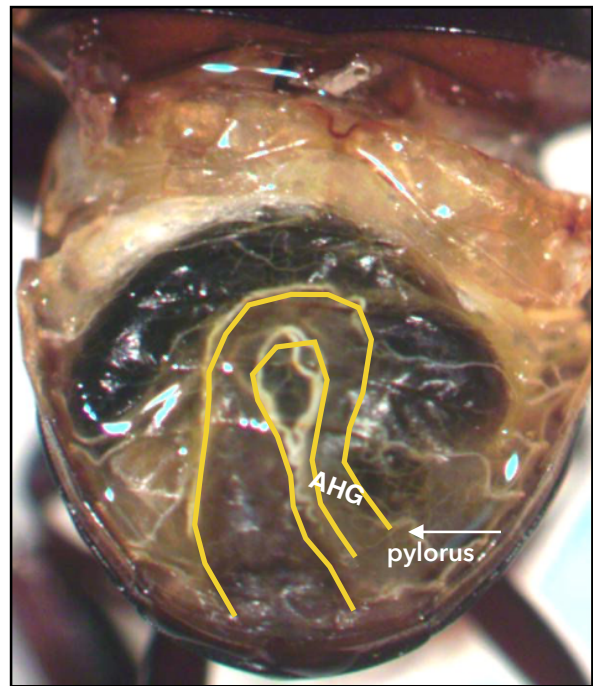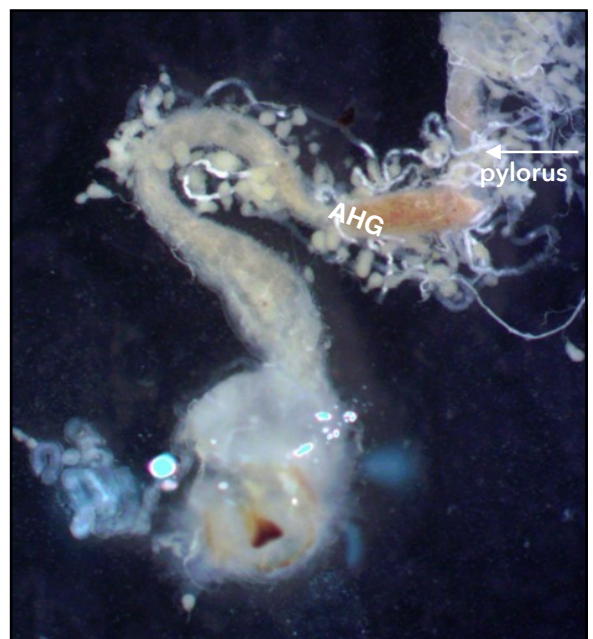

**Fig.S5. *Diorygopyx* hindgut.** Above: *Diorygopyx tibialis* gut *in situ*. Below: gut removed for better viewing. Anterior hind gut is narrow and short.

**Table S6. Core bacterial families present in *Labroma*.** Relative abundance of bacterial families is calculated from an average of four individuals of *Labroma umbratilis*.

| Phylum: CLASS: Family                                         | average relative frequency | total for phylum |
|---------------------------------------------------------------|----------------------------|------------------|
| Bacteroidetes: BACTEROIDIA<br>Porphyromonadaceae              | 11.8                       | 14.8             |
| Bacteroidetes:<br>FLAVOBACTERIIA<br>Flavobacteriaceae         | 2.9                        |                  |
| Bacteroidetes:<br>SPHINGOBACTERIA:<br>Sphingobacteriaceae     | 0.1                        |                  |
| Firmicutes: CLOSTRIDIA:<br>Family XI                          | 5.3                        | 27.8             |
| Firmicutes: CLOSTRIDIA:<br>Ruminococcaceae                    | 4.2                        |                  |
| Firmicutes: BACILLI:<br>Erysipelotrichaceae                   | 5.5                        |                  |
| Firmicutes: BACILLI:<br>Enterococcaceae                       | 12.8                       |                  |
| Proteobacteria:<br>ALPHAPROTEOBACTERIA:<br>Anaplasmataceae    | 0.1                        | 0.1              |
| Proteobacteria:<br>BETAPROTEOBACTERIA:<br>Comamonadaceae      | 0.3                        | 0.3              |
| Proteobacteria:<br>GAMMAPROTEOBACTERIA:<br>Enterobacteriaceae | 31.8                       | 49.1             |
| Proteobacteria:<br>GAMMAPROTEOBACTERIA:<br>Xanthomonadaceae   | 0.3                        |                  |
| Proteobacteria:<br>GAMMAPROTEOBACTERIA:<br>Pseudomonadaceae   | 15.9                       |                  |
| Proteobacteria:<br>GAMMAPROTEOBACTERIA:<br>Moraxellaceae      | 1.1                        |                  |
| total core                                                    | 92.1                       |                  |

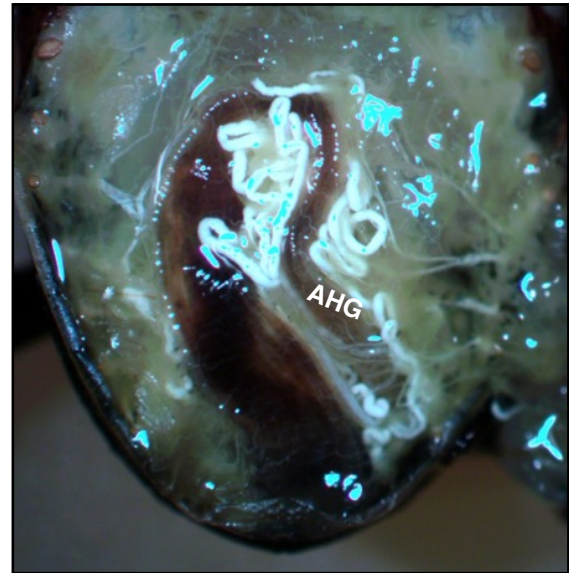

**Fig.S6. *Labroma* hindgut.** The *Labroma umbratilis* hindgut *in situ* shows a narrow anterior region and a short U-shaped gut.



**Table S7. Core bacterial families present in *Lepanus* sp.** Relative abundance of bacterial families is calculated from an average of four individuals from three species of *Lepanus*: *Lepanus ustulatus*, *L. australis*, and *L. NSW2*.

| Phylum: CLASS: Family                                         | average relative frequency | total for phylum |
|---------------------------------------------------------------|----------------------------|------------------|
| Bacteroidetes:<br>BACTEROIDIA<br>Porphyromonadaceae           | 20.3                       | 33.1             |
| Bacteroidetes:<br>FLAVOBACTERIIA<br>Flavobacteriaceae         | 12.8                       |                  |
| Firmicutes: CLOSTRIDIA:<br>Ruminococcaceae                    | 18.0                       | 25.8             |
| Firmicutes: BACILLI:<br>Erysipelotrichaceae                   | 2.5                        |                  |
| Firmicutes: NEGATIVICUTES:<br>Vellionellaceae                 | 5.3                        |                  |
| Proteobacteria:<br>ALPHAPROTEOBACTERIA:<br>Rhizobiales        | 1.4                        | 1.4              |
| Proteobacteria:<br>BETAPROTEOBACTERIA:<br>Comamonadaceae      | 7.0                        | 7.0              |
| Proteobacteria:<br>GAMMAPROTEOBACTERIA:<br>Enterobacteriaceae | 6.4                        | 14.6             |
| Proteobacteria:<br>GAMMAPROTEOBACTERIA:<br>Orbaceae           | 1.4                        |                  |
| Proteobacteria:<br>GAMMAPROTEOBACTERIA:<br>Moraxellaceae      | 4.1                        |                  |
| Proteobacteria:<br>GAMMAPROTEOBACTERIA:<br>Pseudomonadaceae   | 0.4                        |                  |
| Proteobacteria:<br>GAMMAPROTEOBACTERIA:<br>Xanthomonadaceae   | 2.3                        |                  |
| total core:                                                   | 81.9                       |                  |

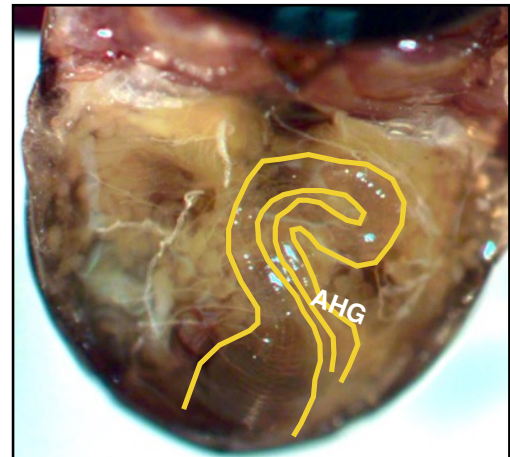

*Lepanus ustulatus*

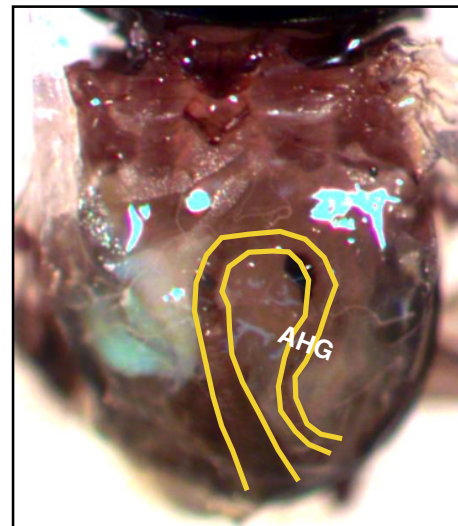

*Lepanus australis*

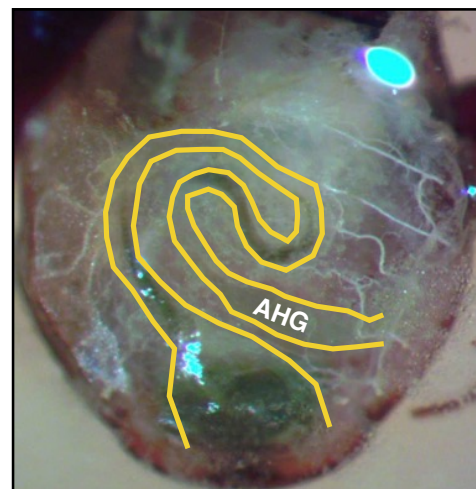

*Lepanus NSW2*

**Fig.S7. *Lepanus* hindguts.** Three species of *Lepanus* hindgut *in situ* showing slightly different gut configurations for each species.

**Table S8. Core bacterial families present in *Mentophilus*.** Relative abundance of bacterial families is calculated from an average of two individuals of *Mentophilus hollandiae*.

| Phylum: CLASS: Family                                          | average relative frequency | total for phylum |
|----------------------------------------------------------------|----------------------------|------------------|
| Bacteroidetes: BACTEROIDIA<br>Bacteroidaceae                   | 15.6                       | 43.1             |
| Bacteroidetes: BACTEROIDIA<br>Porphyromonadaceae               | 9.9                        |                  |
| Bacteroidetes: BACTEROIDIA<br>Rikenellaceae                    | 17.6                       |                  |
| Deferribacteres:<br>DEFERRIBACTERES:<br>Deferribacteraceae     | 0.7                        | 0.7              |
| Firmicutes: BACILLI:<br>Enterococcaceae                        | 0.1                        | 22.7             |
| Firmicutes: CLOSTRIDIA<br>Christensenellaceae                  | 0.1                        |                  |
| Firmicutes: CLOSTRIDIA<br>Lachnospiraceae                      | 4.1                        |                  |
| Firmicutes: CLOSTRIDIA:<br>Peptococcaceae                      | 0.7                        |                  |
| Firmicutes: CLOSTRIDIA<br>Ruminococcaceae                      | 17.1                       |                  |
| Firmicutes: NEGATIVICUTES:<br>Vellionellaceae                  | 0.5                        |                  |
| Planctomycetes: vadinHA49                                      | 8.0                        | 8.0              |
| Proteobacteria:<br>DELTAPROTEOBACTERIA:<br>Desulfovibrionaceae | 17.78                      | 17.78            |
| Proteobacteria:<br>GAMMAPROTEOBACTERIA:<br>Moraxellaceae       | 0.75                       | 6.1              |
| Proteobacteria:<br>GAMMAPROTEOBACTERIA:<br>Xanthomonadaceae    | 5.31                       |                  |
| total                                                          | 98.24                      |                  |

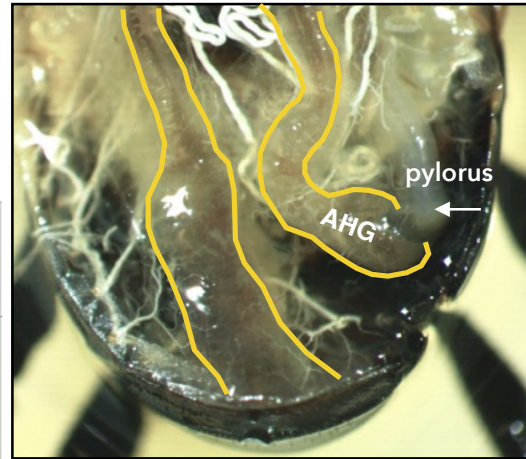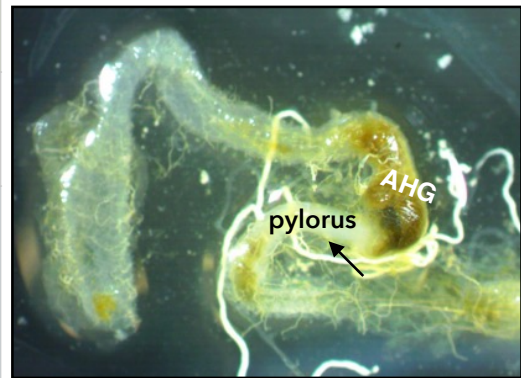

**Fig.S8. *Mentophilus* hindgut.**

Above: The *Mentophilus hollandiae* hind gut *in situ*. A small expanded region of the anterior hind-gut is visible just posterior to the ileum. Below: gut removed from abdominal cavity. A small expanded region is evident after the pylorus, but the hindgut is relatively short.

**Table S9. Core bacterial families present in *Tesserodon*.** Relative abundance of bacterial families is calculated from an average of two individuals of *Tesserodon pilicrepus*.

| Phylum: CLASS: Family                                           | average relative frequency | total for phylum |
|-----------------------------------------------------------------|----------------------------|------------------|
| Bacteroidetes: BACTEROIDIA<br>Porphyromonadaceae                | 15.6                       | 39.9             |
| Bacteroidetes: BACTEROIDIA<br>Bacteroidaceae                    | 13.7                       |                  |
| Bacteroidetes: BACTEROIDIA<br>Rikenellaceae                     | 10.6                       |                  |
| Firmicutes: NEGATIVICUTES:<br>Acidaminococcaceae                | 2.0                        | 21.1             |
| Firmicutes: BACILLI:<br>Enterococcaceae                         | 0.2                        |                  |
| Firmicutes: CLOSTRIDIA<br>Ruminococcaceae                       | 16.6                       |                  |
| Firmicutes: CLOSTRIDIA<br>Lachnospiraceae                       | 1.4                        |                  |
| Firmicutes: CLOSTRIDIA<br>Christensenellaceae                   | 0.8                        |                  |
| Betaproteobacteria:<br>Oxalobacteriaceae                        | 0.4                        | 0.4              |
| Betaproteobacteria:<br>Comamonadaceae                           | 1.7                        | 1.7              |
| Proteobacteria:<br>DELTAPROTEOBACTERIA:<br>Desulfovibrionaceae  | 18.0                       | 24.7             |
| Proteobacteria:<br>DELTAPROTEOBACTERIA:<br>Rs-K70-termite group | 6.7                        |                  |
| Planctomycetes: vadinHA49                                       | 8.8                        | 8.8              |
| Deferribacteres:<br>DEFERRIBACTERES:<br>Deferribacteraceae      | 0.8                        | 0.8              |
| Synergistetes: SYNERGISTIA:<br>Synergistaceae                   | 0.4                        | 0.4              |
| Archaea                                                         | 1.6                        | 1.6              |
| total core                                                      | 99.3                       |                  |

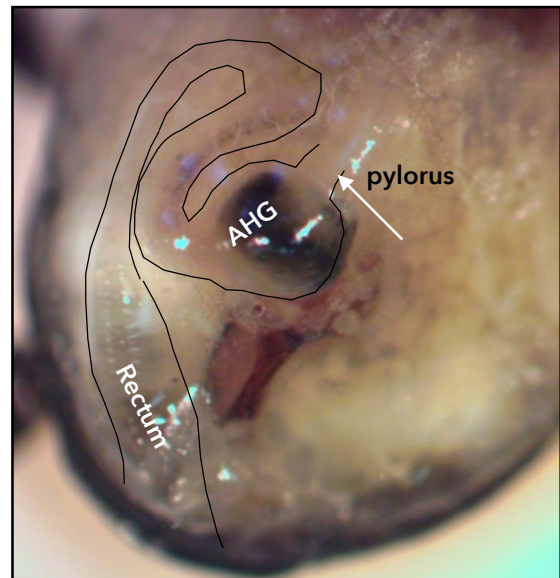

**Fig.S9. *Tesserodon* hindgut.** *Tesserodon pilicrepus* hindgut *in situ* shows a small expanded region of the anterior hind-gut, visible just posterior to the ileum.

**Table S10. Core bacterial families present in dung-feeding *Onthophagus*.** Relative abundance of bacterial families is calculated from an average of 92% of individuals (12 out of 13) from five species: *Onthophagus arrilla*, *O. CQ2*, *O. fuliginosus*, *O. granulatus*, *O. pugnax*.

| Phylum: CLASS: Family                                         | average relative frequency | total for phylum |
|---------------------------------------------------------------|----------------------------|------------------|
| Proteobacteria:<br>BETAPROTEOBACTERIA:<br>Comamonadaceae      | 1.8                        | 1.8%             |
| Proteobacteria:<br>GAMMAPROTEOBACTERIA:<br>Enterobacteriaceae | 34.0                       | 53%              |
| Proteobacteria:<br>GAMMAPROTEOBACTERIA:<br>Pseudomonadaceae   | 19.0                       |                  |
| total % core                                                  | 54.8                       |                  |

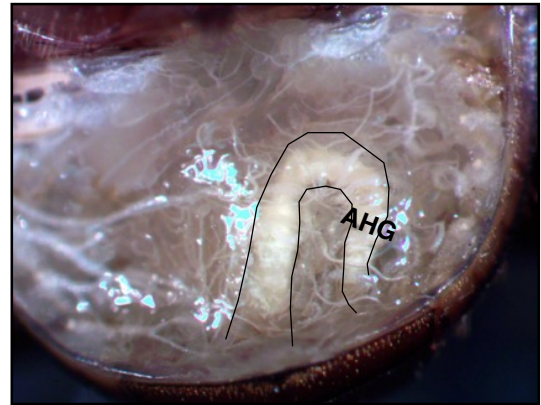

**Fig.S10. *Onthophagus* hindgut.** Hindgut of the dung-feeding *Onthophagus pugnax in situ*. The hind-gut is simple U-shape and short with a single bend; the white material was commonly seen in the *Onthophagus* gut.

**Table S11. Core bacterial families present in mushroom-feeding *Onthophagus*.** Relative abundance of bacterial families is calculated from an average of six individuals from two species: *O. dunningi* and *O. kumbaingeri*.

| Phylum: CLASS: Family                                         | average relative frequency | total for phylum |
|---------------------------------------------------------------|----------------------------|------------------|
| Bacteroidetes:<br>CHITINOPHAGIA:<br>Chitinophagaceae          | 0.5                        | 7.1              |
| Bacteroidetes:<br>FLAVOBACTERIIA<br>Flavobacteriaceae         | 6.0                        |                  |
| Bacteroidetes: BACTEROIDIA<br>Porphyromonadaceae              | 0.6                        |                  |
| Proteobacteria:<br>BETAPROTEOBACTERIA:<br>Comamonadaceae      | 3.3                        | 3.3              |
| Proteobacteria:<br>GAMMAPROTEOBACTERIA:<br>Moraxellaceae      | 0.9                        | 23.0             |
| Proteobacteria:<br>GAMMAPROTEOBACTERIA:<br>Enterobacteriaceae | 22.1                       |                  |
| Firmicutes: BACILLI:<br>Erysipelotrichaceae                   | 19.1                       | 35.4             |
| Firmicutes: BACILLI:<br>Enterococcaceae                       | 16.3                       |                  |
| total % core                                                  | 68.8                       |                  |

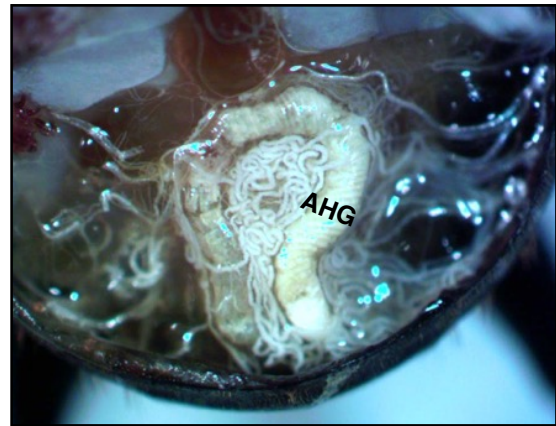

**Fig.S11. *Onthophagus dunningi* hindgut.** Hindgut of the mushroom-feeding *O. dunningi* *in situ*. The hindgut is a simple U-shape and short with a single bend; the white material was commonly seen in the *Onthophagus* gut.

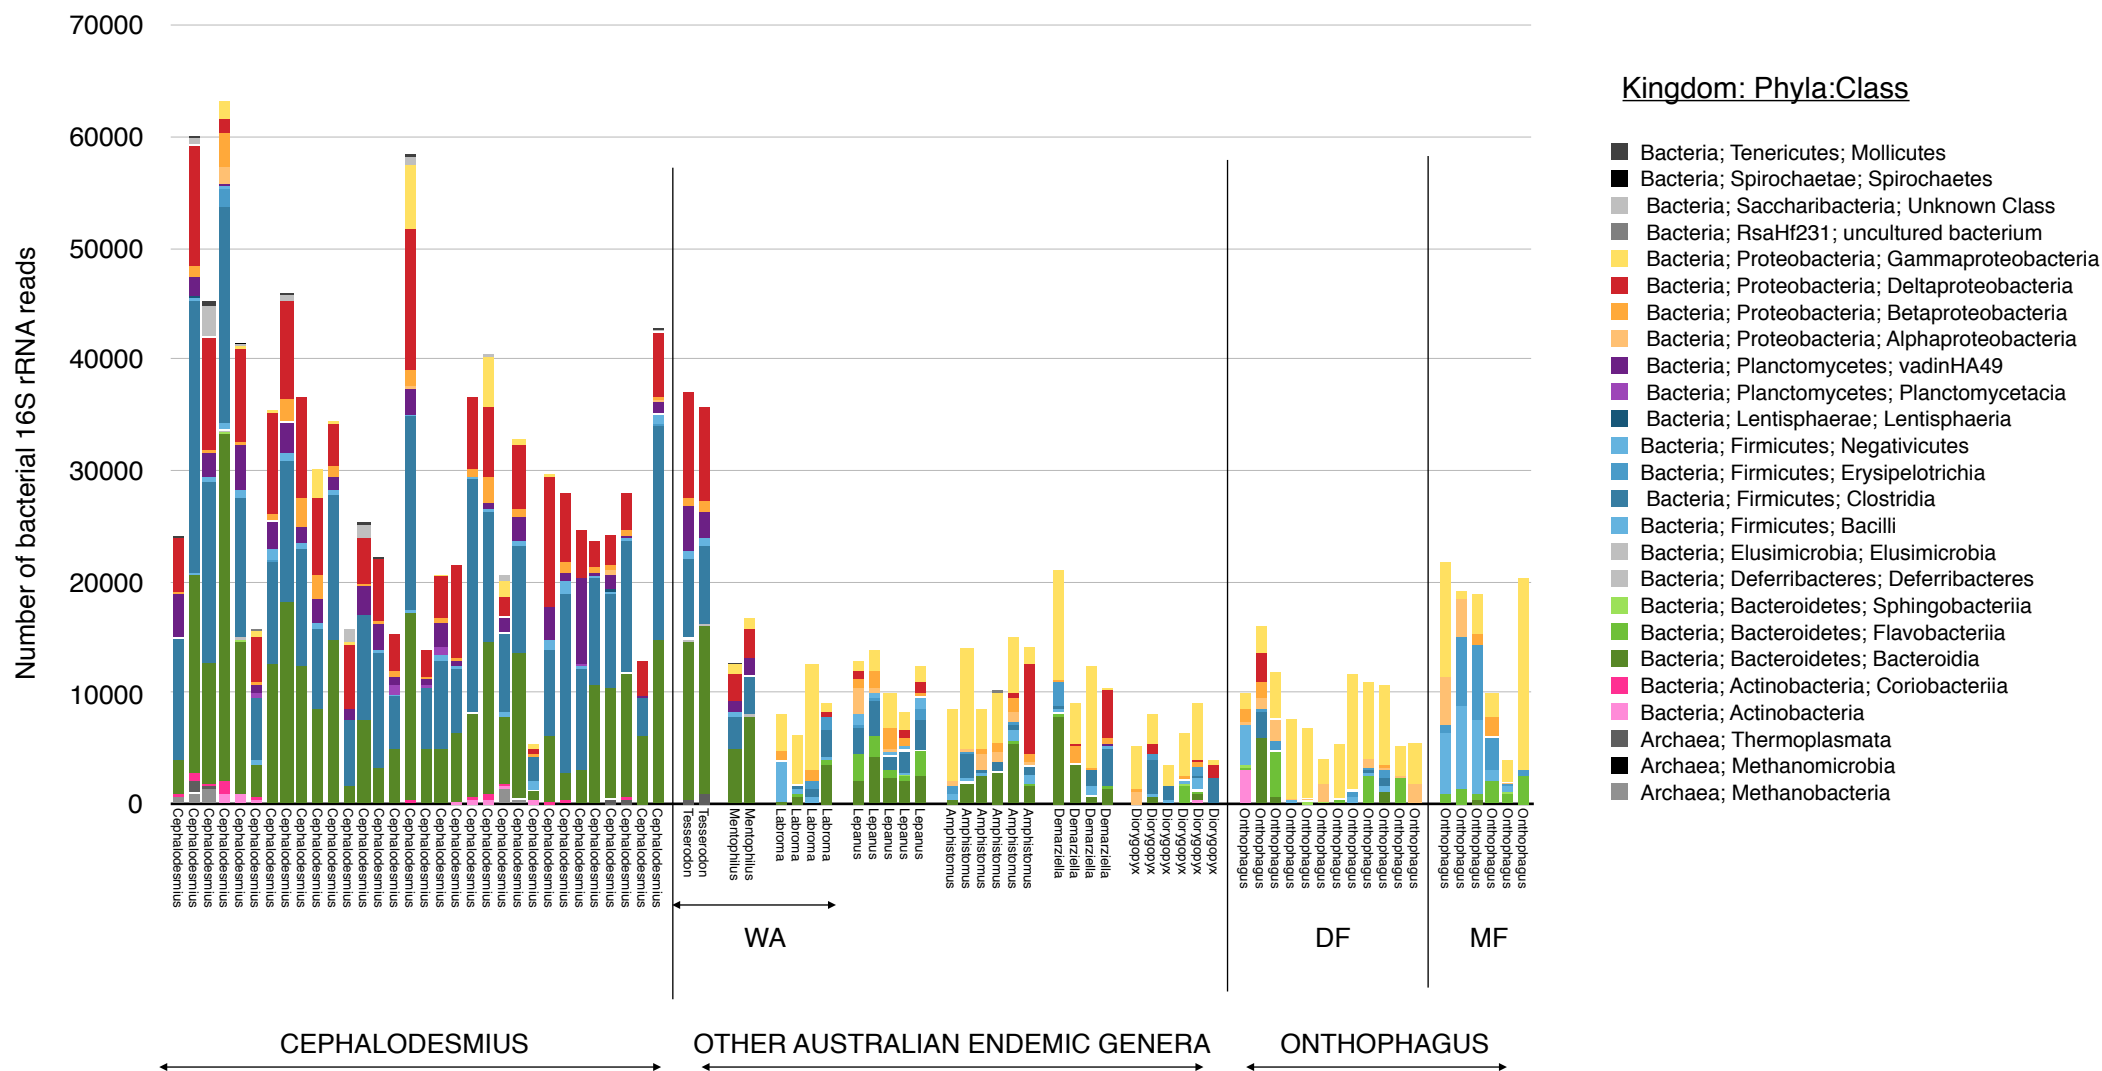

**Figure S12. Number of bacterial 16S rRNA reads (Phylum:Class) in dung beetle gut samples.** Members of the beetle genus *Cephalodesmius* are on the left. The other Australian endemic genera are separated into genera collected from Western Australia (WA) and Queensland. The *Onthophagus* gut community is shown on the right. DF indicates the dung-feeding *Onthophagus* and MF indicates the mushroom-feeding *Onthophagus*. The bacterial classes are colour-coded by phyla, for example, shades of green represent Bacteroidetes, yellow-orange-red are Proteobacteria, shades of blue represent Firmicutes purple represents Planctomycetes and brown and grey represent other minor classes.
